# Supplementary material
Source: ML conference proceedings conference paper supplement (https://openreview.net/forum?id=4WoJDxyCxq)
Supplement: supplementary_material [file attachment]

## A PROOFS

*Proof of Theorem 1.* [Extended from Xu et al. (2021)] By Xu et al. (2021, Lemma 2), according to the data symmetry in (4), the optimal linear classifier has the form

$$1, \dots, 1, b_\gamma = \arg \min_{\mathbf{w}, b} \mathcal{R}_\gamma(f(\cdot; \mathbf{w}, b)).$$

Recall that (6) proves that for such linear classifier, the robust error is

$$\mathcal{R}_\gamma(f) = \frac{1}{2} \Phi \left( -\frac{\sqrt{d}(\theta - \gamma)}{\sigma} + \frac{1}{\sqrt{d}\sigma} \cdot b \right) + \frac{1}{2} \Phi \left( -\frac{\sqrt{d}(\theta - \gamma)}{K\sigma} - \frac{1}{K\sqrt{d}\sigma} \cdot b \right),$$

where  $\Phi$  is the cumulative distribution function of standard normal.

The optimal  $b_\gamma$  to minimize  $\mathcal{R}_\gamma(f)$  is achieved at the point that  $\frac{\partial \mathcal{R}_\gamma(f)}{\partial b} = 0$ . Thus,  $b_\gamma$  satisfies:

$$\phi \left( -\frac{\sqrt{d}(\theta - \gamma)}{\sigma} + \frac{b_\gamma}{\sqrt{d}\sigma} \right) \cdot \frac{1}{\sqrt{d}\sigma} - \phi \left( -\frac{\sqrt{d}(\theta - \gamma)}{K\sigma} - \frac{b_\gamma}{K\sqrt{d}\sigma} \right) \cdot \frac{1}{K\sqrt{d}\sigma} = 0$$

where  $\phi$  is the probability density function of standard normal. This equals to

$$\phi \left( -\frac{\sqrt{d}(\theta - \gamma)}{\sigma} + \frac{b_\gamma}{\sqrt{d}\sigma} \right) = \phi \left( -\frac{\sqrt{d}(\theta - \gamma)}{K\sigma} - \frac{b_\gamma}{K\sqrt{d}\sigma} \right) / K$$

and

$$\begin{aligned} K &= \phi \left( -\frac{\sqrt{d}(\theta - \gamma)}{K\sigma} - \frac{b_\gamma}{K\sqrt{d}\sigma} \right) / \phi \left( -\frac{\sqrt{d}(\theta - \gamma)}{\sigma} + \frac{b_\gamma}{\sqrt{d}\sigma} \right) \\ &= e^{-\frac{1}{2} \left[ \left( -\frac{\sqrt{d}(\theta - \gamma)}{K\sigma} - \frac{b_\gamma}{K\sqrt{d}\sigma} \right)^2 - \left( -\frac{\sqrt{d}(\theta - \gamma)}{\sigma} + \frac{b_\gamma}{\sqrt{d}\sigma} \right)^2 \right]} \end{aligned}$$

It is not hard to see

$$-2 \log K = \left( -\frac{\sqrt{d}(\theta - \gamma)}{K\sigma} - \frac{b_\gamma}{K\sqrt{d}\sigma} \right)^2 - \left( -\frac{\sqrt{d}(\theta - \gamma)}{\sigma} + \frac{b_\gamma}{\sqrt{d}\sigma} \right)^2$$

which re-arranges to a quadratic equation

$$b_\gamma^2 \frac{1}{d\sigma^2} \left( 1 - \frac{1}{K^2} \right) - b_\gamma \frac{2(\theta - \gamma)}{\sigma^2} \left( 1 + \frac{1}{K^2} \right) + \frac{d(\theta - \gamma)^2}{\sigma^2} \left( 1 - \frac{1}{K^2} \right) = 2 \log K.$$

The solution is therefore explicit as

$$b_\gamma = \frac{K^2 + 1}{K^2 - 1} d(\theta - \gamma) - K \sqrt{\frac{4d^2(\theta - \gamma)^2}{(K^2 - 1)^2} + d\sigma^2 q(K)},$$

where  $q(K) = \frac{2 \log K}{K^2 - 1}$  which is a positive constant and only depends on  $K$ . By incorporating  $b_\gamma$  into (6), we can get the optimal robust error  $\mathcal{R}_\gamma(f_\gamma)$ :

$$\mathcal{R}_\gamma(f_\gamma) = \frac{1}{2} \Phi \left( B(K, \gamma) - K \sqrt{B(K, \gamma)^2 + q(K)} \right) + \frac{1}{2} \Phi \left( -KB(K, \gamma) + \sqrt{B(K, \gamma)^2 + q(K)} \right),$$

where  $B(K, \gamma) = \frac{2}{K^2 - 1} \frac{\sqrt{d}(\theta - \gamma)}{\sigma}$ . □

*Proof of Theorem 3.* We denote the two roots of  $\frac{\partial \mathcal{R}_\gamma(f(b))}{\partial b} = 0$  as  $b_\gamma^+$  and  $b_\gamma^-$ . Here  $b_\gamma \equiv b_\gamma^-$ . Clearly  $\mathcal{R}_\gamma(b)$  is increasing in  $(b_\gamma^-, b_\gamma^+)$ . We hope to show  $b_0 \in (b_\gamma^-, b_\gamma^+) \forall \gamma > 0$ , so that  $\mathcal{R}_\gamma(b)$  is also increasing in  $(b_\gamma^-, b_0)$ .

Note their Equation (17)

$$\mathcal{R}_\gamma(b) = \frac{1}{2}\Phi\left(-\frac{\sqrt{d}(\theta - \gamma)}{\sigma} + \frac{1}{\sqrt{d}\sigma}b\right) + \frac{1}{2}\Phi\left(-\frac{\sqrt{d}(\theta - \gamma)}{K\sigma} - \frac{1}{K\sqrt{d}\sigma}b\right)$$

Taking derivative w.r.t.  $b$

$$\frac{\partial \mathcal{R}_\gamma(b)}{\partial b} = \frac{1}{2\sqrt{d}\sigma}\phi\left(-\frac{\sqrt{d}(\theta - \gamma)}{\sigma} + \frac{1}{\sqrt{d}\sigma}b\right) - \frac{1}{2K\sqrt{d}\sigma}\phi\left(-\frac{\sqrt{d}(\theta - \gamma)}{K\sigma} - \frac{1}{K\sqrt{d}\sigma}b\right)$$

Setting this derivative to 0:

$$0 = K\phi\left(-\frac{\sqrt{d}(\theta - \gamma)}{\sigma} + \frac{1}{\sqrt{d}\sigma}b\right) - \phi\left(-\frac{\sqrt{d}(\theta - \gamma)}{K\sigma} - \frac{1}{K\sqrt{d}\sigma}b\right)$$

which means

$$\frac{\phi\left(-\frac{\sqrt{d}(\theta - \gamma)}{K\sigma} - \frac{1}{K\sqrt{d}\sigma}b\right)}{\phi\left(-\frac{\sqrt{d}(\theta - \gamma)}{\sigma} + \frac{1}{\sqrt{d}\sigma}b\right)} = K$$

Using the standard normal density  $\phi(u) = e^{-u^2/2}$  and  $\frac{\phi(u)}{\phi(v)} = e^{(v^2 - u^2)/2}$ , we have

$$\begin{aligned} & \left(-\frac{\sqrt{d}(\theta - \gamma)}{\sigma} + \frac{1}{\sqrt{d}\sigma}b\right)^2 - \left(-\frac{\sqrt{d}(\theta - \gamma)}{K\sigma} - \frac{1}{K\sqrt{d}\sigma}b\right)^2 = 2\log K \\ \implies & K^2(-d(\theta - \gamma) + b)^2 - (-d(\theta - \gamma) - b)^2 = 2d\sigma^2 K^2 \log K \\ \implies & (K^2 - 1)b^2 - 2d(\theta - \gamma)(K^2 + 1)b + d^2(\theta - \gamma)^2(K^2 - 1) - 2d\sigma^2 K^2 \log K = 0 \end{aligned}$$

By  $x = -\frac{b}{2a} \pm \frac{\sqrt{b^2 - 4ac}}{2a} = -\frac{b}{2a} \pm \sqrt{\left(\frac{b}{2a}\right)^2 - \frac{c}{a}}$ , we know

$$\begin{aligned} b_\gamma^\pm &= \frac{K^2 + 1}{K^2 - 1}d(\theta - \gamma) \pm \sqrt{\left(\frac{K^2 + 1}{K^2 - 1}d(\theta - \gamma)\right)^2 - d^2(\theta - \gamma)^2 + K^2 d\sigma^2 q(K)} \\ &= \frac{K^2 + 1}{K^2 - 1}d(\theta - \gamma) \pm K\sqrt{\frac{4d^2(\theta - \gamma)^2}{(K^2 - 1)^2} + d\sigma^2 q(K)} \end{aligned}$$

We now derive the sufficient condition that  $b_0 < b_\gamma^+$ :

$$\frac{K^2 + 1}{K^2 - 1}d(\theta) - K\sqrt{\frac{4d^2(\theta)^2}{(K^2 - 1)^2} + d\sigma^2 q(K)} < \frac{K^2 + 1}{K^2 - 1}d(\theta - \gamma) + K\sqrt{\frac{4d^2(\theta - \gamma)^2}{(K^2 - 1)^2} + d\sigma^2 q(K)}.$$

This is equivalent to

$$\frac{K^2 + 1}{K^2 - 1}d\gamma < K\left(\sqrt{\frac{4d^2(\theta - \gamma)^2}{(K^2 - 1)^2} + d\sigma^2 q(K)} + \sqrt{\frac{4d^2\theta^2}{(K^2 - 1)^2} + d\sigma^2 q(K)}\right).$$

Therefore, it suffices to have

$$\frac{K^2 + 1}{2K}\gamma < |\theta - \gamma| + |\theta|$$

Finally, it is easy to see the Pareto statement  $\mathcal{R}_0(f) < \mathcal{R}_0(f_{\text{DP}}) \implies \mathcal{R}_\gamma(f) > \mathcal{R}_\gamma(f_{\text{DP}})$ . A necessary but not sufficient condition for  $\mathcal{R}_0(f) < \mathcal{R}_0(f_{\text{DP}})$  given that  $b_0 > b_{\text{DP}}$  is  $b > b_{\text{DP}}$ , since  $b_0$  is a minimizer which means  $\mathcal{R}_0$  is decreasing on the interval  $(-\infty, b_0)$ . Similarly,  $\mathcal{R}_\gamma$  is increasing on the right of  $b_\gamma$  and thus  $b$  has higher robust error.  $\square$

*Proof of Corollary 3.2.* We can characterize the robust errors based on  $l_2$  attacks in a similar fashion to (6). We notice that

$$\begin{aligned} \mathcal{R}_\gamma(f) &= \mathbb{P}(\exists \|\mathbf{p}\|_2 \leq \epsilon \text{ s.t. } f(\mathbf{x} + \mathbf{p}) \neq y) = \max_{\|\mathbf{p}\|_2 \leq \gamma} \mathbb{P}(f(\mathbf{x} + \mathbf{p}) \neq y) \\ &= \frac{1}{2}\mathbb{P}(f(\mathbf{x} + \gamma_d/\sqrt{d}) \neq -1 \mid y = -1) + \frac{1}{2}\mathbb{P}(f(\mathbf{x} - \gamma_d/\sqrt{d}) \neq +1 \mid y = +1) \end{aligned}$$

In short, the same analysis is in place except  $\gamma \rightarrow \gamma/\sqrt{d}$  when we switch from  $l_\infty$  to  $l_2$  attacks.  $\square$

## B ABLATION STUDIES

### B.1 CELEBA

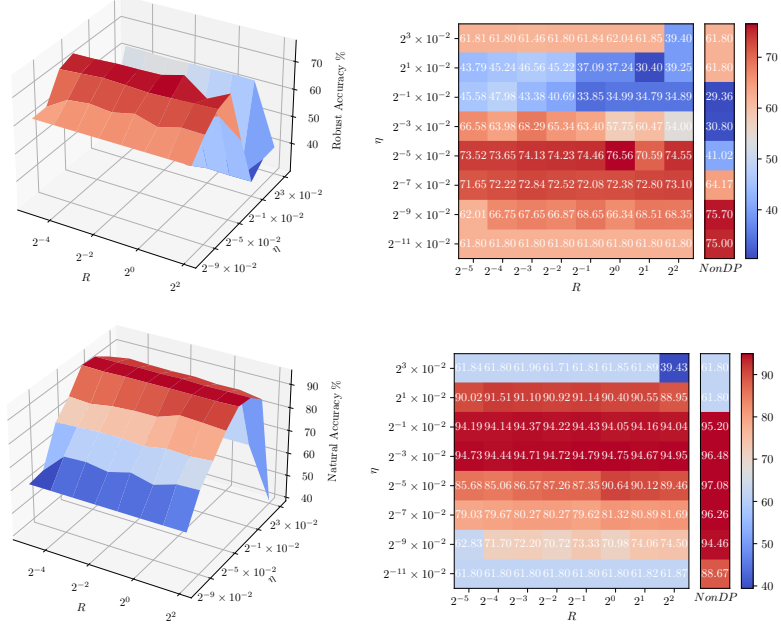

Figure 8: Robust and natural accuracy of  $\eta$  and  $R$  on CeleBA with label ‘Male’. We train a 2-layer CNN using DP-Adam and attack by  $l_\infty(2/255)$  PGD attack. Same as in Figure 7. Here  $\epsilon = 2$ , batch size = 512, epochs = 10.

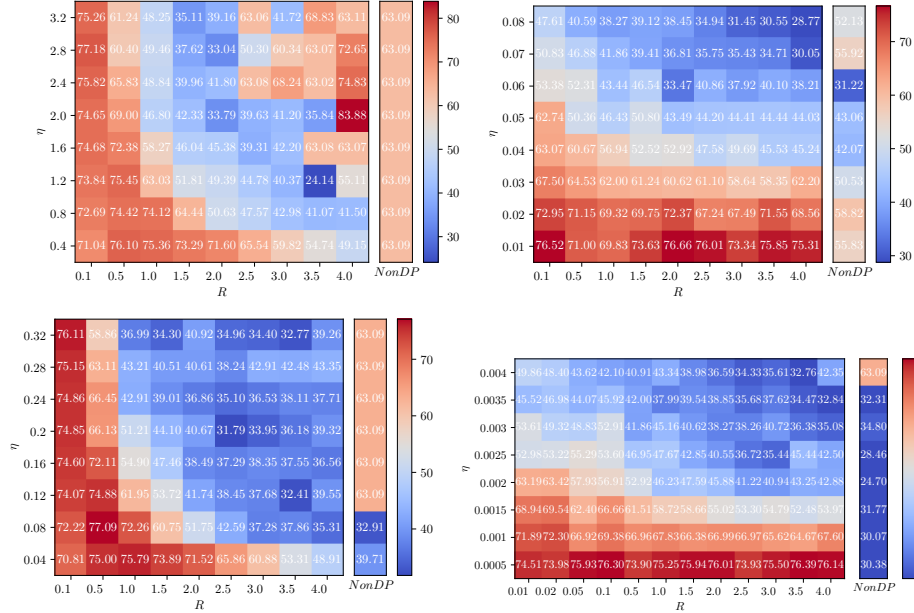

Figure 9: Robust accuracy of CeleBA with label ‘Male’ under different optimizer, trained with a 2-layer CNN and attacked by  $l_\infty(2/255)$  PGD attack. Top left: SGD. Top right: Adagrad. Bottom left: SGD momentum. Bottom right: Adam. Here  $\epsilon = 2$ , batch size = 512, epochs = 10.

### B.2 CIFAR10

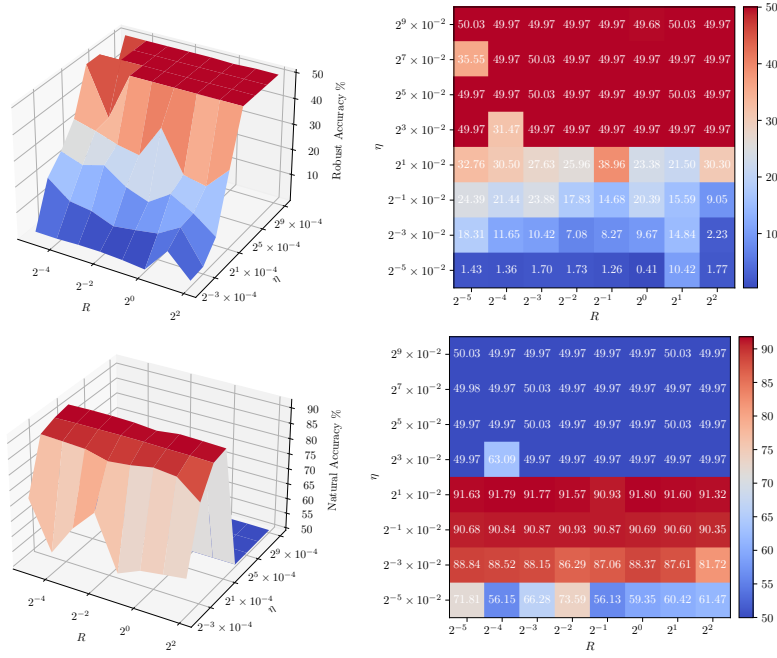

Figure 10: Robust and natural accuracy of  $\eta$  and  $R$  on CelebA with label ‘Smiling’. We train ViT-tiny using DP-RMSprop and attack by  $l_\infty(2/255)$  PGD attack. Here  $\epsilon = 2$ , batch size = 1024, epoch = 1.

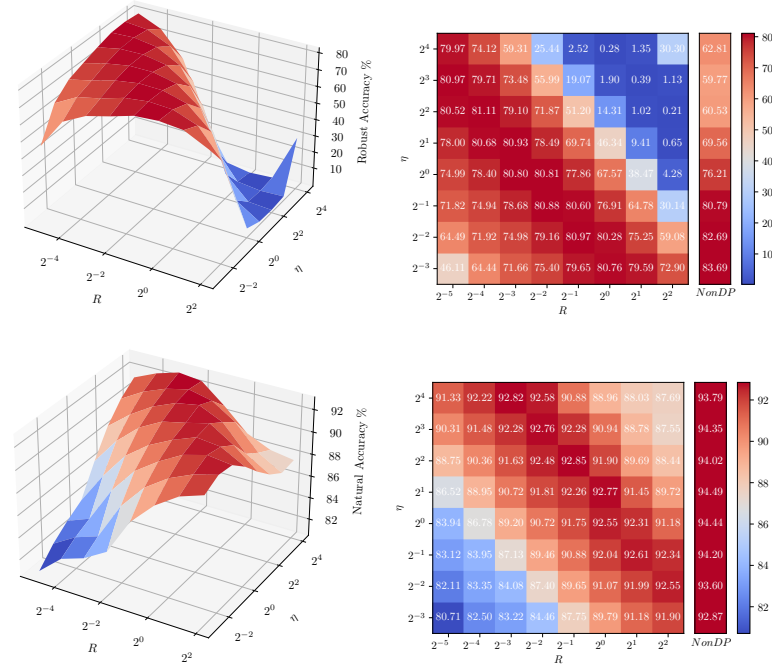

Figure 11: Robust and clean accuracy of  $\eta$  and  $R$  on CIFAR10, transferred from SimCLRv2 pre-trained on unlabelled ImageNet. We use DP-SGD and attack by  $l_\infty(2/255)$  PGD attack. Here  $\epsilon = 2$ , batch size = 1024, epochs = 50.

## B.3 MNIST

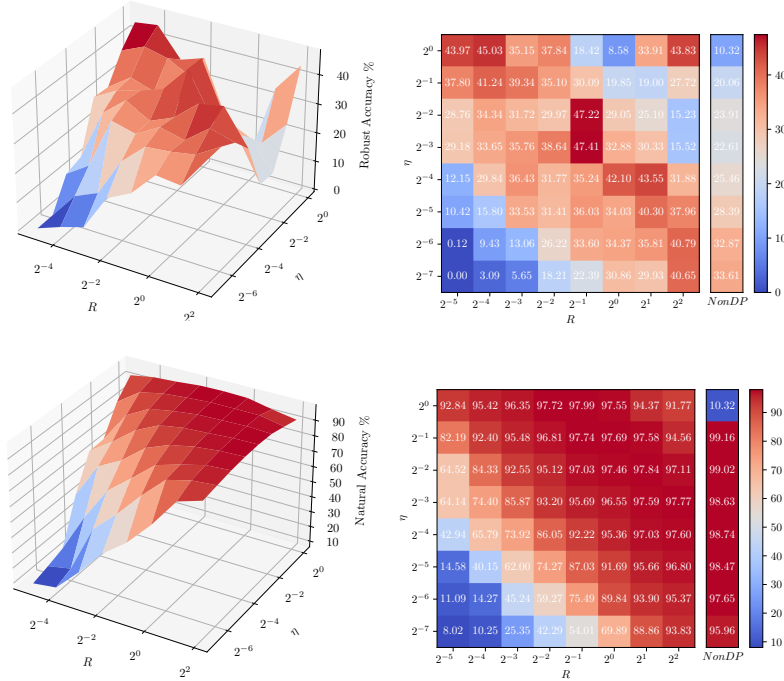

Figure 12: Robust and clean accuracy of  $\eta$  and  $R$  on MNIST. We train the CNN from Tramer & Boneh (2020) using DP-SGD and attack by  $l_\infty(32/255)$  PGD attack. Here  $\epsilon = 2$ , batch size = 512, epochs = 40.

## B.4 FASHION MNIST

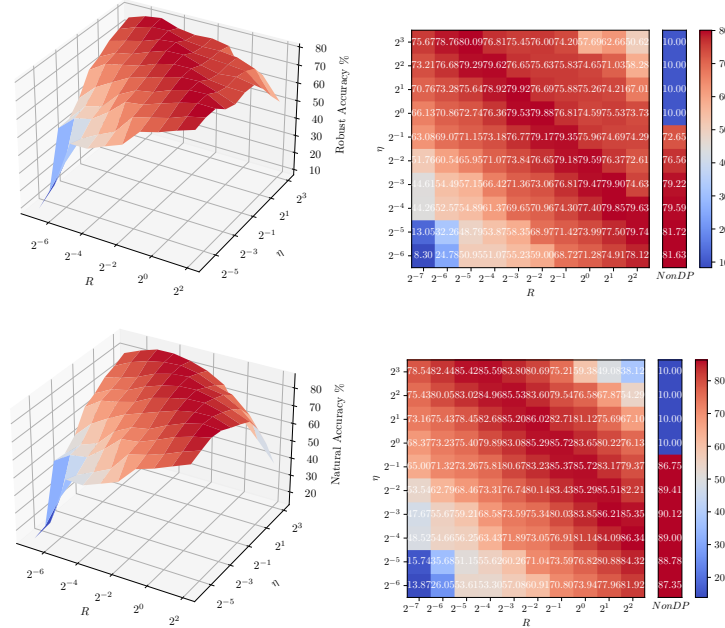

Figure 13: Robust and clean accuracy of  $\eta$  and  $R$  on Fashion MNIST. We train the CNN from Tramer & Boneh (2020) using DP-SGD and attack by  $l_\infty(2/255)$  PGD attack. Here  $\epsilon = 2$ , batch size = 2048, epochs = 40.

## C MORE TABLES

| attack<br>magnitude | SimCLRv2 pre-trained on unlabelled ImageNet |                      |                      |                      |                      |                      |                               |                               | ResNet50                      |                               |
|---------------------|---------------------------------------------|----------------------|----------------------|----------------------|----------------------|----------------------|-------------------------------|-------------------------------|-------------------------------|-------------------------------|
|                     | DP<br>$\epsilon = 2$                        | DP<br>$\epsilon = 2$ | DP<br>$\epsilon = 4$ | DP<br>$\epsilon = 4$ | DP<br>$\epsilon = 8$ | DP<br>$\epsilon = 8$ | Non-DP<br>$\epsilon = \infty$ | Non-DP<br>$\epsilon = \infty$ | Non-DP<br>$\epsilon = \infty$ | Non-DP<br>$\epsilon = \infty$ |
|                     | robust                                      | accurate             | robust               | accurate             | robust               | accurate             | robust                        | accurate                      | adv 0.5                       | accurate                      |
| $\gamma = 0$        | 89.69%                                      | 92.87%               | 90.91%               | 93.41%               | 91.22%               | 93.64%               | 94.29%                        | 94.55%                        | 90.83%                        | 95.25%                        |
| $\gamma = 0.25$     | 82.12%                                      | 59.91%               | 83.35%               | 74.10%               | 83.77%               | 79.03%               | 82.91%                        | 72.63%                        | 82.34%                        | 8.66%                         |
| $\gamma = 0.5$      | 71.99%                                      | 12.76%               | 72.79%               | 40.97%               | 73.08%               | 54.53%               | 63.32%                        | 35.95%                        | 70.17%                        | 0.28%                         |
| $\gamma = 1.0$      | 46.30%                                      | 9.49%                | 44.46%               | 8.97%                | 44.65%               | 9.68%                | 18.81%                        | 0.98%                         | 40.47%                        | 0.00%                         |
| $\gamma = 2.0$      | 4.82%                                       | 9.49%                | 3.12%                | 8.97%                | 2.97%                | 9.63%                | 0.00%                         | 0.07%                         | 5.23%                         | 0.00%                         |

Table 5: Natural and robust accuracy of SimCLRv2 (Chen et al., 2020) and ResNet50 (Engstrom et al., 2019) on CIFAR10 under 20 steps  $l_2$  PGD attack. Here *robust* parameters are obtained by grid search over  $\eta$  and  $R$  against  $l_2(0.25)$ , and *accurate* parameters are directly adopted from Tramer & Boneh (2020) for highest natural accuracy. See detailed hyperparameters in Appendix D.

|                    | Natural | FGSM   | BIM    | PGD $_{\infty}$ | APGD $_{\infty}$ | PGD $_2$ | APGD $_2$ |
|--------------------|---------|--------|--------|-----------------|------------------|----------|-----------|
| Non-DP             | 94.55%  | 18.71% | 15.97% | 15.96%          | 16.04%           | 35.95%   | 35.89%    |
| DP, $\epsilon = 2$ | 92.73%  | 10.35% | 0.03%  | 0.03%           | 0.03%            | 12.76%   | 12.68%    |
| DP, $\epsilon = 4$ | 93.49%  | 30.10% | 9.10%  | 9.09%           | 9.12%            | 40.97%   | 41.01%    |
| DP, $\epsilon = 8$ | 93.74%  | 31.86% | 28.08% | 28.09%          | 28.09%           | 54.53%   | 54.54%    |

Table 6: Natural and robust accuracy of models transferred from unlabelled ImageNet pre-trained SIMCLRv2 on CIFAR10 under general adversarial attacks with  $\gamma_{\infty} = 4/255$  and  $\gamma_2 = 0.5$ . Attack steps are 20 if applicable. Model hyper-parameters are directly adopted from Tramer & Boneh (2020) for highest natural accuracy. DP models are trained using DP-SGD,  $R = 0.1$ ,  $\eta_{DP} = 4$ , momentum = 0.9, batch size = 1024. Non-DP models are trained using SGD with the same hyper-parameters except  $\eta_{non-DP} = 0.4$ .

| attack magnitude | Non-DP<br>$\epsilon = \infty$ | DP<br>$\epsilon = 2$ | DP<br>$\epsilon = 4$ | DP<br>$\epsilon = 8$ |
|------------------|-------------------------------|----------------------|----------------------|----------------------|
| $\gamma = 0.0$   | 99.24%                        | 98.01%               | 98.32%               | 98.50%               |
| $\gamma = 0.25$  | 97.57%                        | 95.29%               | 95.94%               | 96.65%               |
| $\gamma = 0.5$   | 93.32%                        | 90.28%               | 91.71%               | 92.97%               |
| $\gamma = 1.0$   | 66.58%                        | 63.95%               | 73.32%               | 77.08%               |
| $\gamma = 2.0$   | 36.28%                        | 39.88%               | 51.48%               | 52.74%               |

Table 7: Robust accuracy on MNIST under 20 steps  $l_2$  PGD attack. Model hyper-parameters are directly adopted from Tramer & Boneh (2020) for highest natural accuracy. DP models are trained using DP-SGD,  $R = 0.1$ ,  $\eta_{DP} = 0.5$ , momentum = 0.9, batch size = 512. Non-DP models are trained using SGD with the same hyper-parameters except  $\eta_{non-DP} = 0.05$ .

| attack magnitude  | Non-DP<br>$\epsilon = \infty$ | DP<br>$\epsilon = 2$ | DP<br>$\epsilon = 4$ | DP<br>$\epsilon = 8$ |
|-------------------|-------------------------------|----------------------|----------------------|----------------------|
| $\gamma = 0.0$    | 99.24%                        | 98.01%               | 98.32%               | 98.50%               |
| $\gamma = 2/255$  | 98.73%                        | 97.12%               | 97.43%               | 97.84%               |
| $\gamma = 4/255$  | 97.88%                        | 95.78%               | 96.32%               | 97.13%               |
| $\gamma = 8/255$  | 95.32%                        | 92.31%               | 93.51%               | 94.74%               |
| $\gamma = 16/255$ | 82.06%                        | 77.67%               | 80.28%               | 85.82%               |

Table 8: Robust accuracy on MNIST under 20 steps  $l_{\infty}$  PGD attack. Model hyper-parameters are directly adopted from Tramer & Boneh (2020) for highest natural accuracy. DP models are trained using DP-SGD,  $R = 0.1$ ,  $\eta_{DP} = 0.5$ , momentum = 0.9, batch size = 512. Non-DP models are trained using SGD with the same hyper-parameters except  $\eta_{non-DP} = 0.05$ .

|                     | Natural | FGSM   | BIM    | PGD <sub>∞</sub> | APGD <sub>∞</sub> | PGD <sub>2</sub> | APGD <sub>2</sub> |
|---------------------|---------|--------|--------|------------------|-------------------|------------------|-------------------|
| Non-DP              | 99.24%  | 97.92% | 97.88% | 97.88%           | 97.77%            | 93.32%           | 93.27%            |
| DP , $\epsilon = 2$ | 98.01%  | 95.89% | 95.80% | 95.79%           | 95.63%            | 90.28%           | 90.15%            |
| DP , $\epsilon = 4$ | 98.32%  | 96.45% | 96.32% | 96.33%           | 96.27%            | 91.71%           | 91.68%            |
| DP , $\epsilon = 8$ | 98.50%  | 97.19% | 97.15% | 97.15%           | 97.06%            | 92.97%           | 92.94%            |

Table 9: Natural and robust accuracy of CNN models on MNIST under general adversarial attacks with  $\gamma_\infty = 4/255$  and  $\gamma_2 = 0.5$ . Attack steps are 20 if applicable. Model hyper-parameters are directly adopted from Tramer & Boneh (2020) for highest natural accuracy. DP models are trained using DP-SGD,  $R = 0.1$ ,  $\eta_{DP} = 0.5$ , momentum = 0.9, batch size = 512. Non-DP models are trained using SGD with the same hyper-parameters except  $\eta_{non-DP} = 0.05$ .

| attack magnitude | Non-DP<br>$\epsilon = \infty$ | DP<br>$\epsilon = 2$ | DP<br>$\epsilon = 4$ | DP<br>$\epsilon = 8$ |
|------------------|-------------------------------|----------------------|----------------------|----------------------|
| $\gamma = 0.0$   | 89.75%                        | 85.95%               | 86.60%               | 86.74%               |
| $\gamma = 0.25$  | 57.37%                        | 69.24%               | 72.93%               | 75.35%               |
| $\gamma = 0.5$   | 25.21%                        | 46.09%               | 54.30%               | 59.23%               |
| $\gamma = 1.0$   | 7.87%                         | 16.77%               | 25.95%               | 29.08%               |
| $\gamma = 2.0$   | 7.47%                         | 11.77%               | 16.85%               | 17.00%               |

Table 10: Robust accuracy on Fashion MNIST under 20 steps  $l_2$  PGD attack. Model hyper-parameters are directly adopted from Tramer & Boneh (2020) for highest natural accuracy. DP models are trained using DP-SGD,  $R = 0.1$ ,  $\eta_{DP} = 4$ , momentum = 0.9, batch size = 2048. Non-DP models are trained using SGD with the same hyper-parameters except  $\eta_{non-DP} = 0.4$ .

| attack magnitude  | Non-DP<br>$\epsilon = \infty$ | DP<br>$\epsilon = 2$ | DP<br>$\epsilon = 4$ | DP<br>$\epsilon = 8$ |
|-------------------|-------------------------------|----------------------|----------------------|----------------------|
| $\gamma = 0.0$    | 89.75%                        | 85.95%               | 86.60%               | 86.74%               |
| $\gamma = 2/255$  | 76.19%                        | 78.29%               | 79.84%               | 81.47%               |
| $\gamma = 4/255$  | 64.46%                        | 69.75%               | 72.60%               | 74.72%               |
| $\gamma = 8/255$  | 47.24%                        | 54.62%               | 57.87%               | 60.52%               |
| $\gamma = 16/255$ | 23.26%                        | 28.51%               | 31.68%               | 30.90%               |

Table 11: Robust accuracy on Fashion MNIST under 20 steps  $l_\infty$  PGD attack. Model hyper-parameters are directly adopted from Tramer & Boneh (2020) for highest natural accuracy. DP models are trained using DP-SGD,  $R = 0.1$ ,  $\eta_{DP} = 4$ , momentum = 0.9, batch size = 2048. Non-DP models are trained using SGD with the same hyper-parameters except  $\eta_{non-DP} = 0.4$ .

|                     | Natural | FGSM   | BIM    | PGD <sub>∞</sub> | APGD <sub>∞</sub> | PGD <sub>2</sub> | APGD <sub>2</sub> |
|---------------------|---------|--------|--------|------------------|-------------------|------------------|-------------------|
| Non-DP              | 89.75%  | 70.41% | 64.56% | 64.44%           | 53.41%            | 25.21%           | 23.13%            |
| DP , $\epsilon = 2$ | 85.95%  | 72.11% | 69.76% | 69.71%           | 67.13%            | 46.09%           | 45.41%            |
| DP , $\epsilon = 4$ | 86.60%  | 73.67% | 72.68% | 72.69%           | 70.84%            | 54.30%           | 53.92%            |
| DP , $\epsilon = 8$ | 86.74%  | 75.45% | 74.75% | 74.74%           | 73.71%            | 59.23%           | 58.98%            |

Table 12: Natural and robust accuracy of CNN models on Fashion MNIST under general adversarial attacks with  $\gamma_\infty = 4/255$  and  $\gamma_2 = 0.5$ . Attack steps are 20 if applicable. Model hyper-parameters are directly adopted from Tramer & Boneh (2020) for highest natural accuracy. DP models are trained using DP-SGD,  $R = 0.1$ ,  $\eta_{DP} = 4$ , momentum = 0.9, batch size = 2048. Non-DP models are trained using SGD with the same hyper-parameters except  $\eta_{non-DP} = 0.4$ .

|                    | Natural | FGSM   | BIM    | PGD <sub>∞</sub> | APGD <sub>∞</sub> | PGD <sub>2</sub> | APGD <sub>2</sub> |
|--------------------|---------|--------|--------|------------------|-------------------|------------------|-------------------|
| Non-DP             | 94.29%  | 14.48% | 12.02% | 12.00%           | 12.03%            | 31.36%           | 31.28%            |
| DP, $\epsilon = 2$ | 92.73%  | 15.70% | 1.59%  | 1.61%            | 1.62%             | 28.05%           | 28.06%            |
| DP, $\epsilon = 4$ | 93.49%  | 30.89% | 5.23%  | 5.27%            | 5.25%             | 35.96%           | 35.98%            |
| DP, $\epsilon = 8$ | 93.74%  | 9.66%  | 4.30%  | 4.29%            | 4.31%             | 33.21%           | 33.23%            |

Table 13: Natural and robust accuracy of models transferred from unlabelled ImageNet pre-trained SIMCLRv2 on CIFAR10 under general adversarial attacks with  $\gamma_\infty = 4/255$  and  $\gamma_2 = 0.5$ . Attack steps are 20 if applicable. Model in each row is the most accurate model obtained by simple grid search: Non-DP:  $\eta = 0.5$ ; DP $_{\epsilon=2}$ :  $\eta = 1.0, R = 0.25$ ; DP $_{\epsilon=4}$ :  $\eta = 8, R = 0.0625$ , DP $_{\epsilon=8}$ :  $\eta = 0.5, R = 1.0$ . All models are trained using SGD or DP-SGD, momentum = 0.9 and batch size = 1024.

## D HYPERPARAMETER SETUP

In Table 1, SimCLRv2 models are pre-trained on unlabelled ImageNet and fine-tuned on CIFAR10. *Accurate* models are directly adopted from Tramer & Boneh (2020) for highest natural accuracy, where optimizer is DP-SGD and SGD,  $R = 0.1$ ,  $\eta_{DP} = 4$ ,  $\eta_{non-DP} = 0.4$ , momentum = 0.9, batch size = 1024. *Robust* models are obtained by grid search over  $\eta$  and  $R$  against  $l_\infty(2/255)$ , where Non-DP:  $\eta = 0.0625$ ; DP $_{\epsilon=2}$ :  $\eta = 4, R = 0.0625$ ; DP $_{\epsilon=4}$ :  $\eta = 0.5, R = 0.0625$ , DP $_{\epsilon=8}$ :  $\eta = 0.125, R = 0.25$ . Other settings are the same as the *accurate* ones. Adversarial attack is  $l_\infty$ , 20 steps, alpha = 0.1.

In Table 5, SimCLRv2 models are pre-trained on unlabelled ImageNet and fine-tuned on CIFAR10. *Accurate* models are directly adopted from Tramer & Boneh (2020) for highest natural accuracy, where optimizer is DP-SGD and SGD,  $R = 0.1$ ,  $\eta_{DP} = 4$ ,  $\eta_{non-DP} = 0.4$ , momentum = 0.9, batch size = 1024. *Robust* models are obtained by grid search over  $\eta$  and  $R$  against  $l_2(0.25)$ , where Non-DP:  $\eta = 0.0625$ ; DP $_{\epsilon=2}$ :  $\eta = 0.0625, R = 0.25$ ; DP $_{\epsilon=4}$ :  $\eta = 0.5, R = 0.0625$ , DP $_{\epsilon=8}$ :  $\eta = 0.125, R = 0.25$ . Other settings are the same as the *accurate* ones. Adversarial attack is  $l_2$ , 20 steps, alpha = 0.1.

In Figure 6, models are SimCLRv2 pre-trained on unlabelled ImageNet and fine-tuned on CIFAR10 using DP-SGD, with  $\epsilon = 8$ , batch size = 1024. Adversarial attack is  $l_\infty$  PGD,  $\gamma = 4/255$ , alpha=0.1.

In Table 2, models the same as in Table 1 with *robust* parameters, where optimizer is DP-SGD and SGD, momentum = 0.9, batch size = 1024, Non-DP:  $\eta = 0.0625$ ; DP $_{\epsilon=2}$ :  $\eta = 4, R = 0.0625$ ; DP $_{\epsilon=4}$ :  $\eta = 0.5, R = 0.0625$ , DP $_{\epsilon=8}$ :  $\eta = 0.125, R = 0.25$ . Adversarial attack steps = 20, alpha = 0.1 if applicable.

In Table 3, models are ResNet18 and ViT-tiny trained on CelebA, label Smiling. Images are resized to  $224 \times 224$ . Optimizer is DP-RMSprop with epochs = 5, batch size = 1024,  $\eta = 0.0002$ ,  $R = 0.1$ , delta=5e-6. Adversarial attack is  $l_\infty$  PGD, 20 steps, alpha =  $1/255$ .

In Table 4, models are ResNet18 as in Table 3, trained on CelebA, label ‘Smiling’. Images are resized to  $224 \times 224$ . Optimizer is DP-RMSprop with epochs = 5, batch size = 1024,  $\eta = 0.0002$ ,  $R = 0.1$ , delta=5e-6. Adversarial attack is  $l_\infty(2/255)$  with  $\alpha_\infty = 1/255$  and  $l_2(0.25)$  with  $\alpha_2 = 0.2$ , 20 steps, if applicable.

In Figure 7, models are 2-layer CNN trained on CelebA label ‘Male’ using DP-Adam, where  $\epsilon = 2$ , batch size = 512, epochs = 10. Adversarial attack is  $l_\infty(2/255)$  PGD, 20 steps, alpha = 0.1.
